# Supplementary material for: Optimized step size control within the Rosenbrock solvers for stiff chemical ODE systems in KPP version 2.2.3_rs4
Source: Copernicus journal article supplement (doi:10.5194/gmd-2024-166), 2025-01-06
Supplement: Supplementary file 7 [file gmd-2024-166-supplement.zip]

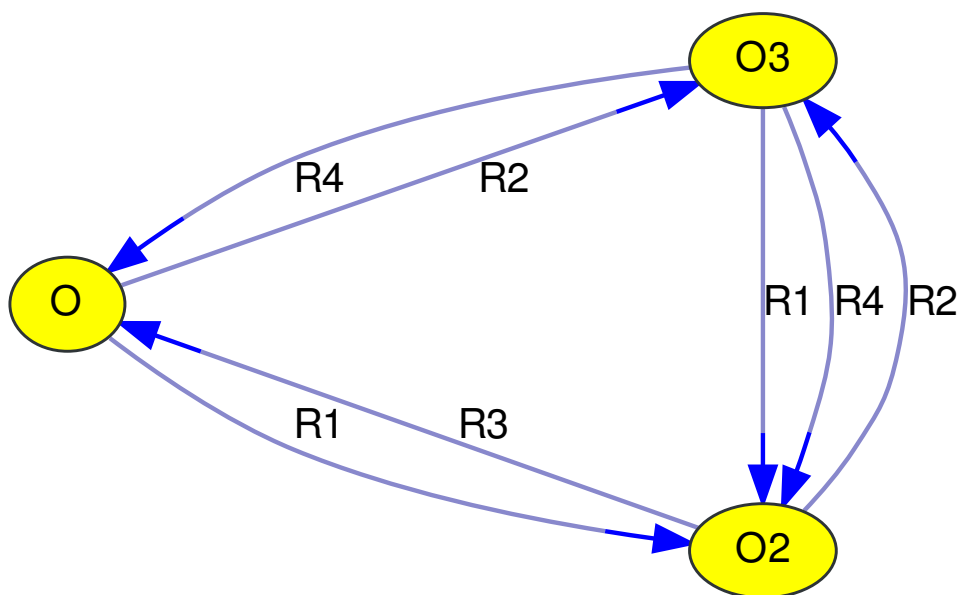

# MEXPLORER-0.0.1

## User Manual

*The Mechanism Explorer*

**Rolf Sander**

Air Chemistry Department  
Max-Planck Institute of Chemistry  
PO Box 3060, 55020 Mainz, Germany  
`rolf.sander@mpic.de`

Date: 2021-04-13

## Contents

|          |                                                    |          |
|----------|----------------------------------------------------|----------|
| <b>1</b> | <b>Installation</b>                                | <b>2</b> |
| <b>2</b> | <b>Input files</b>                                 | <b>2</b> |
| <b>3</b> | <b>Example usage</b>                               | <b>2</b> |
| <b>4</b> | <b>Step 1: Defining the graph</b>                  | <b>2</b> |
| <b>5</b> | <b>Step 2: Analysing the reaction mechanism</b>    | <b>2</b> |
| <b>6</b> | <b>Step 3: Graph information and visualization</b> | <b>2</b> |

## 1 Installation

Before installing MEXPLORER, ensure that these pre-requisites are fulfilled:

- necessary: python-3.6
- necessary: graph-tool<sup>1</sup>
- optional: CAABA/MECCA<sup>2</sup>
- optional: skeleton (OIC.dat)

As an alternative to the standalone version of MEXPLORER, it is also available integrated in the CAABA/MECCA atmospheric chemistry boxmodel (since version 4.6.0) in the `caaba/mecca/mexplorer` directory.

## 2 Input files

information about the chemical mechanism is available in KPP format, as described below.

`mecca.spc`, `mecca.eqn`, `caaba_mecca_rr.nc` (optional), `OIC.dat` (optional)

mechanism in kpp format

Usage via config file `*.ini`

## 3 Example usage

- List and visualize the species and reactions of the Chapman mechanism:  
`mexplorer.py -i chapman.ini`
- Create a file with the methane chemistry in graph-tool xml format:  
`mexplorer.py -i CH4_def.ini`
- Plot the most important reactions in the degradation from dimethyl sulfide to SO<sub>2</sub>:  
`mexplorer.py -i S_DMS_to_SO2_maxflow.ini`
- Plot all reactions in the degradation from dimethyl sulfoxide to SO<sub>2</sub> in the MCM:  
`mexplorer.py -i mcm_DMSO_to_SO2.ini`

- Show all species that can produce HCHO within 2 steps:  
`info_graph.py -so HCHO,2 simple.xml.gz`
- Show all “primary” species (those that have no precursors) and all “final” species (those that have no sinks) in the MCM:  
`info_graph.py mcm.xml.gz -p -f`
- Show all species and reactions in the methane chemistry mechanism:  
`info_graph.py -s -r chapman.xml.gz`
- Show all species that are directly produced from isoprene in the MCM, and list the corresponding reactions:  
`info_graph.py -si C5H8 mcm.xml.gz`

## 4 Step 1: Defining the graph

save as a graph-tool compatible xml file

The resulting graph is directly transferred to step 2, and it can also be saved to a `*.xml` file.

## 5 Step 2: Analysing the reaction mechanism

The resulting graph is directly transferred to step 3, and it can also be saved to a `*.xml` file.

## 6 Step 3: Graph information and visualization

<sup>1</sup><https://graph-tool.skewed.de>

<sup>2</sup><http://www.rolf-sander.net/messy/mecca>
