# Supplementary figures and images for: Optimized step size control within the Rosenbrock solvers for stiff chemical ODE systems in KPP version 2.2.3_rs4
Source: Copernicus journal article supplement (doi:10.5194/gmd-2024-166), 2025-01-06

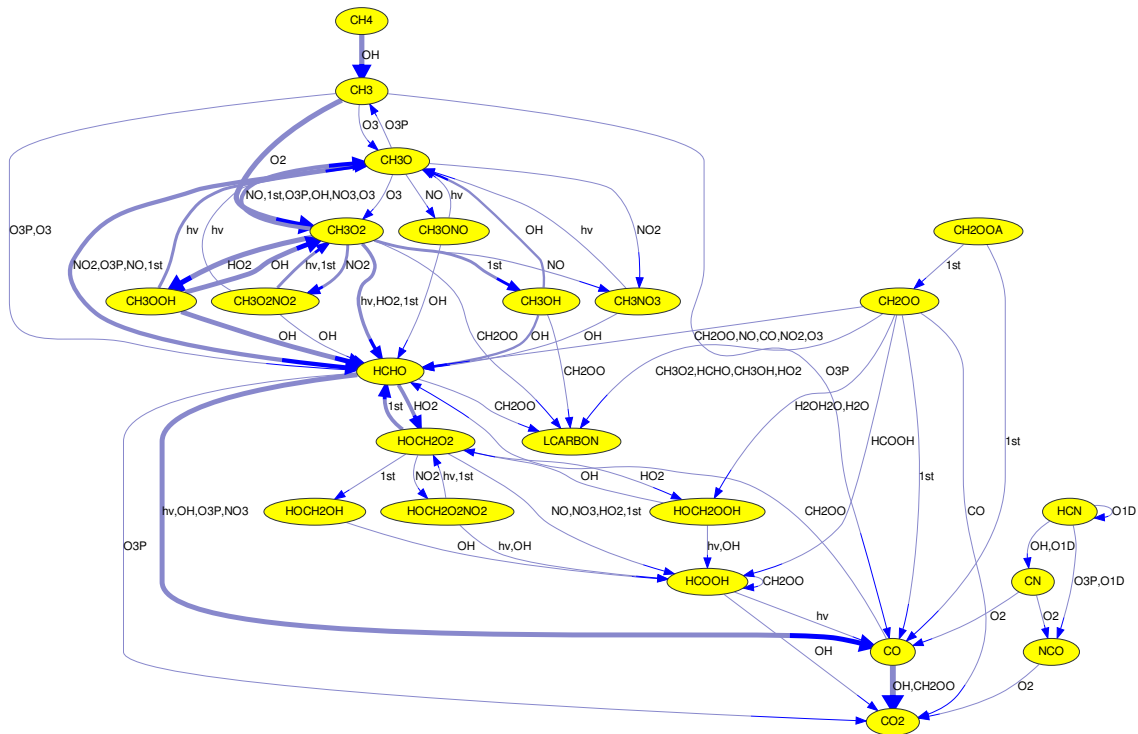

Supplement: Supplementary file 1 [file gmd-2024-166-supplement.zip]

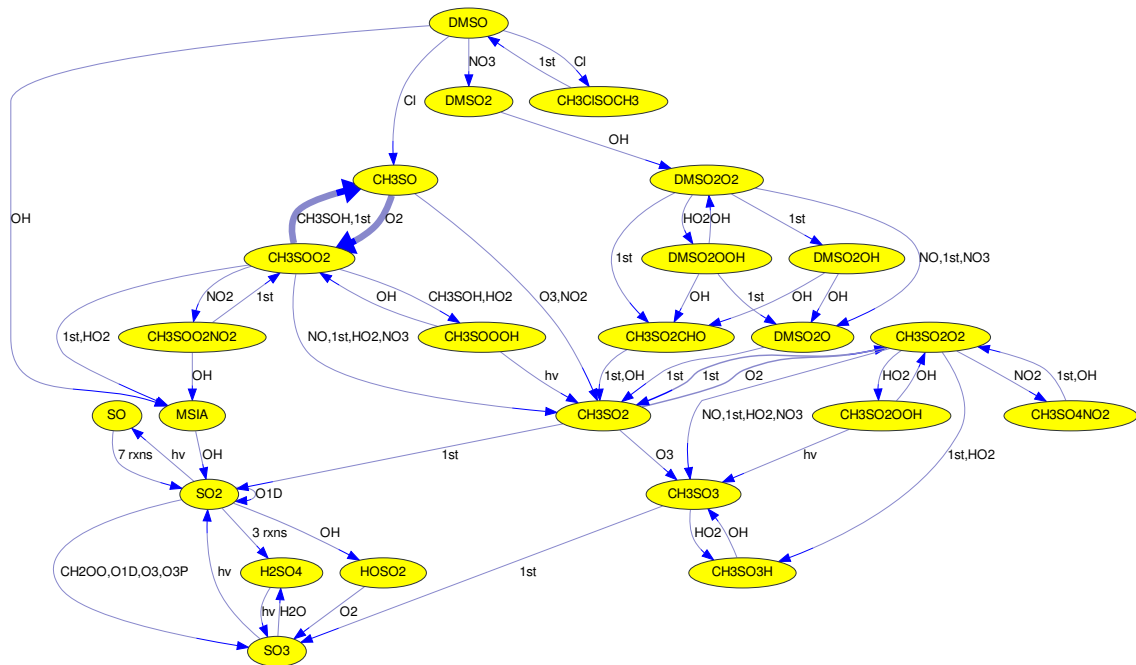

Supplement: Supplementary file 2 [file gmd-2024-166-supplement.zip]

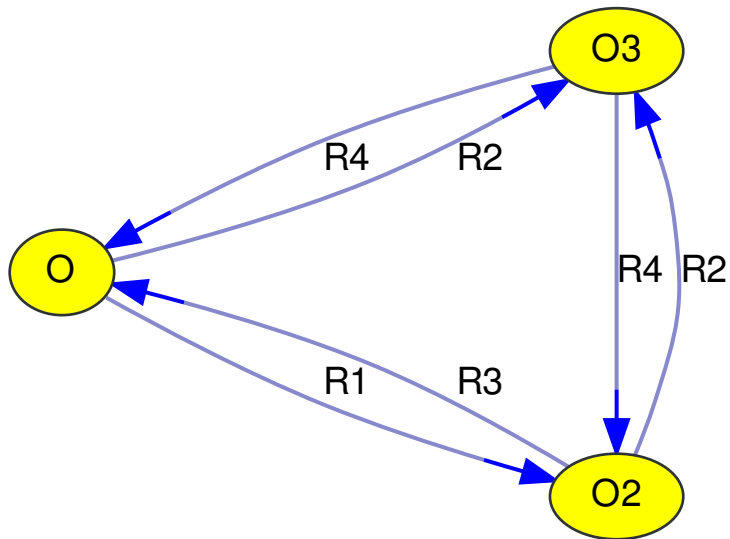

Supplement: Supplementary file 3 [file gmd-2024-166-supplement.zip]

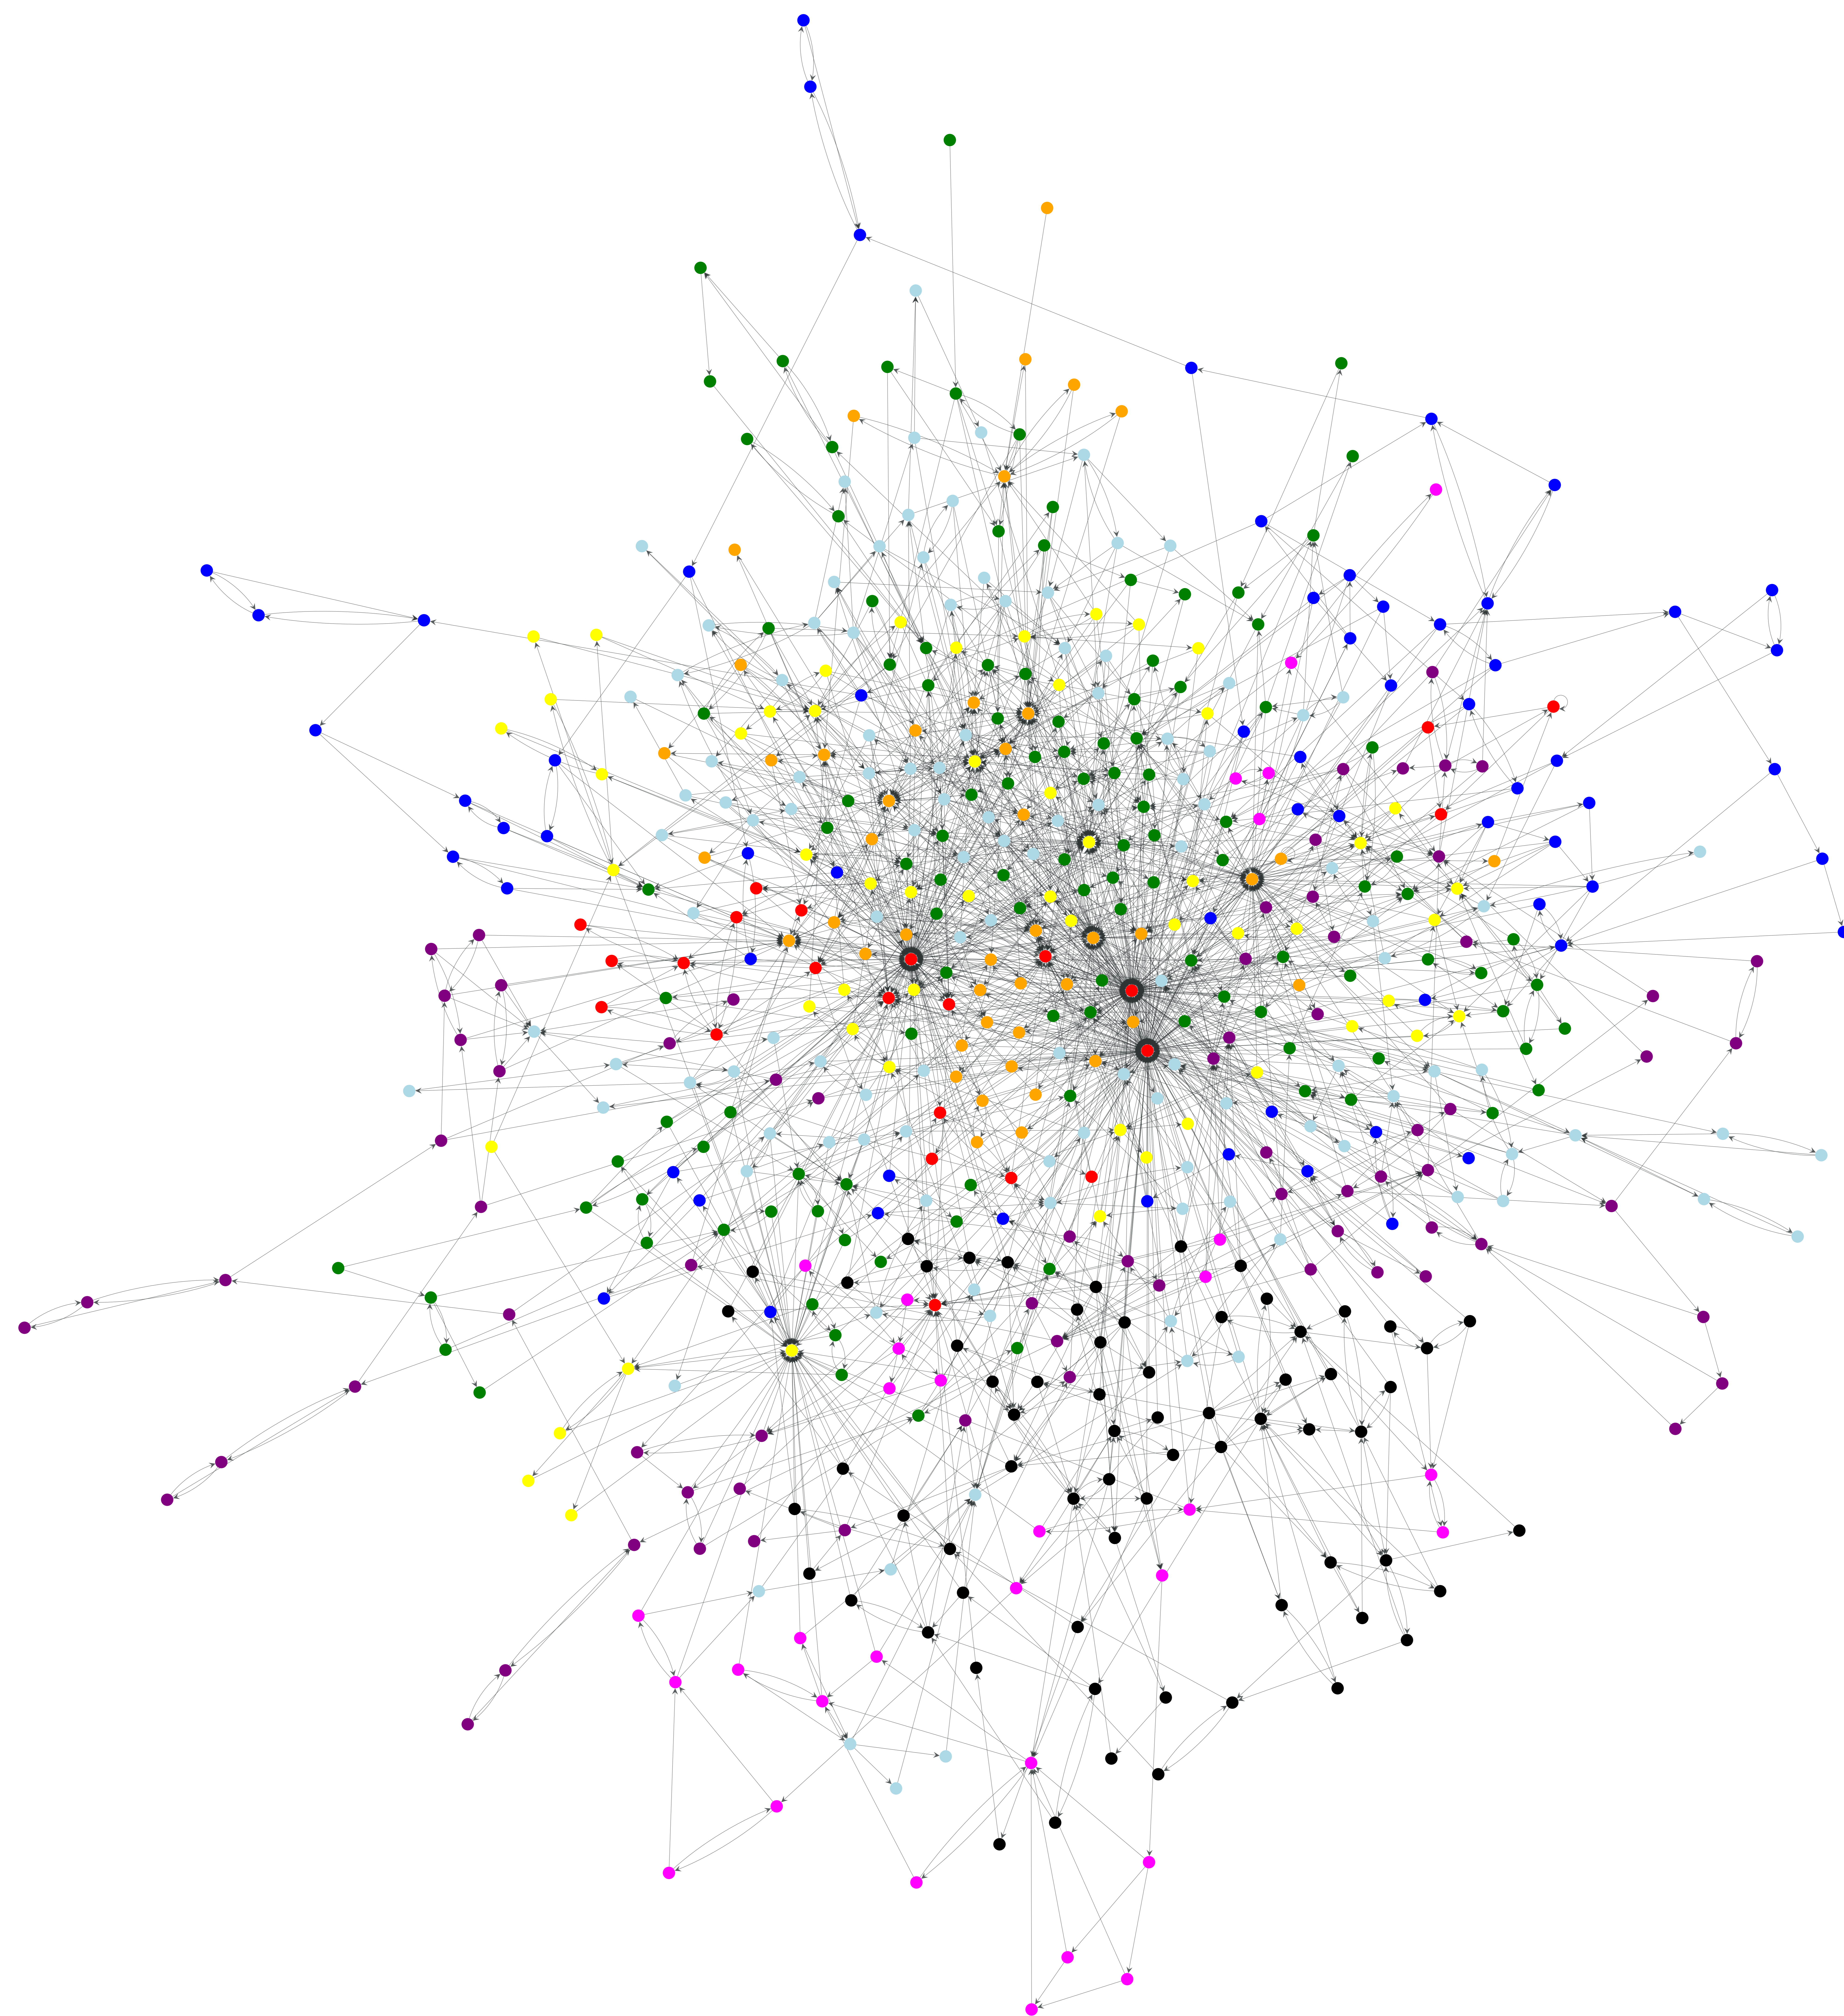

Supplement: Supplementary file 4 [file gmd-2024-166-supplement.zip]

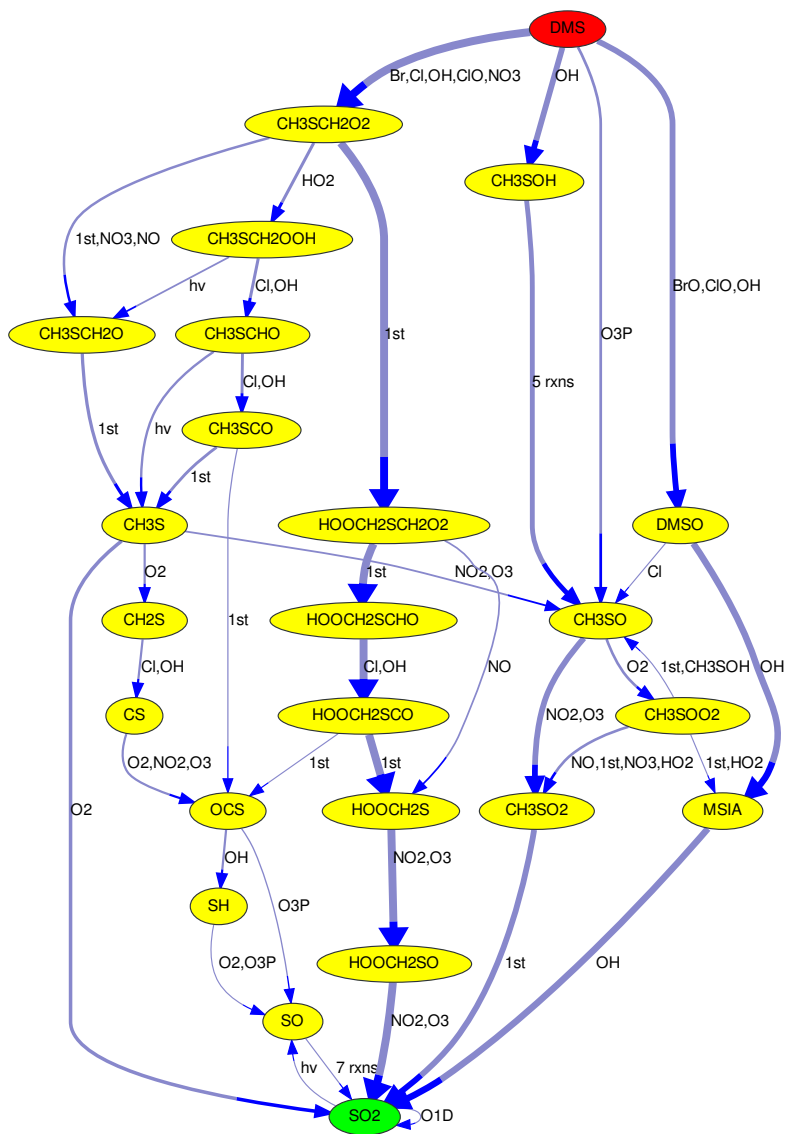

Supplement: Supplementary file 5 [file gmd-2024-166-supplement.zip]

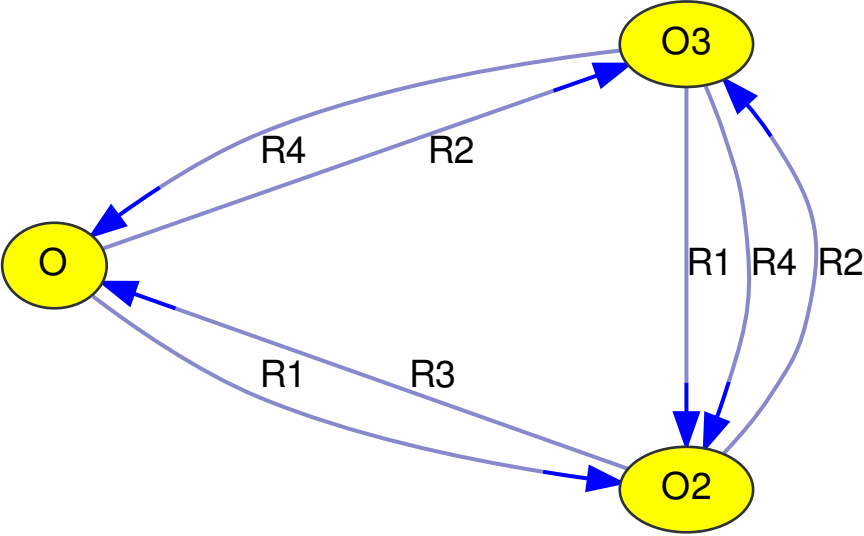

Supplement: Supplementary file 6 [file gmd-2024-166-supplement.zip]

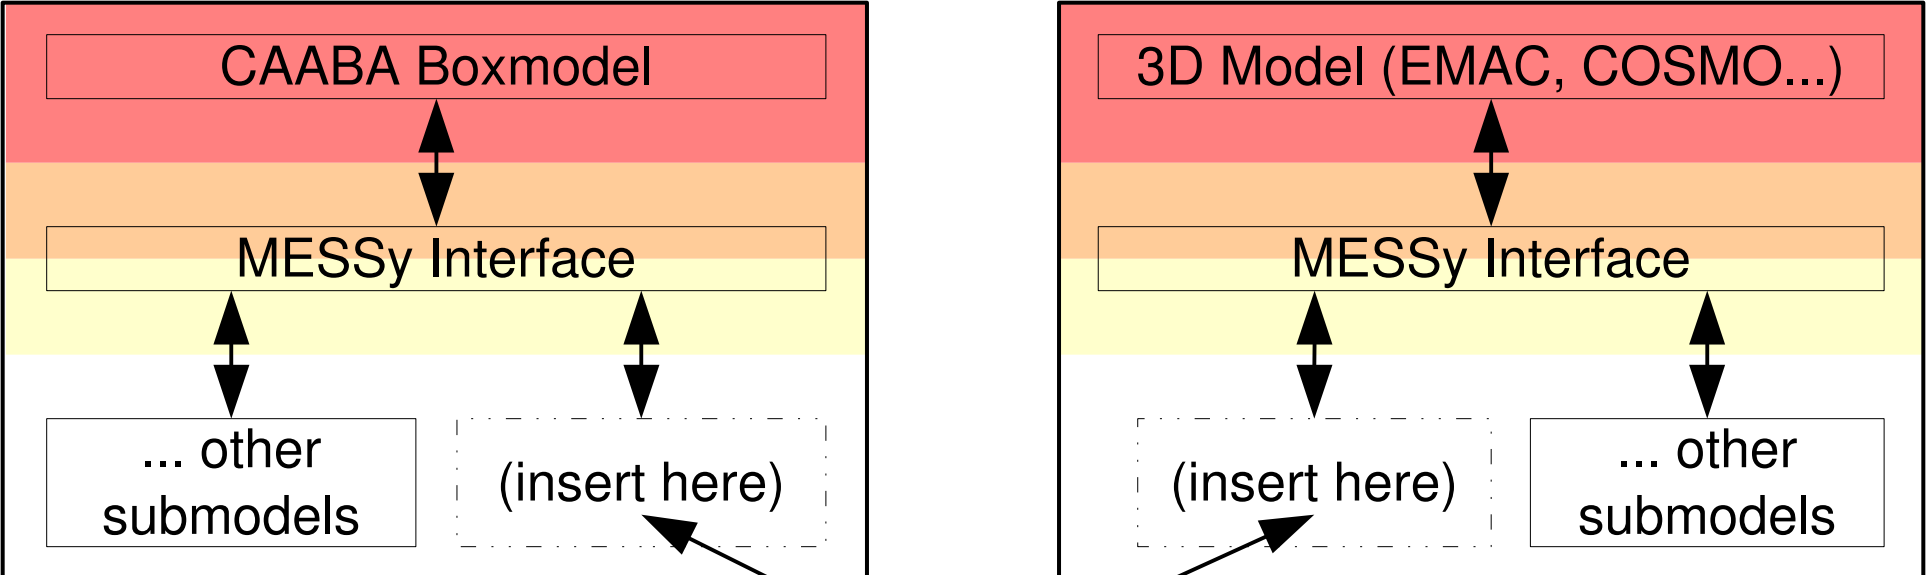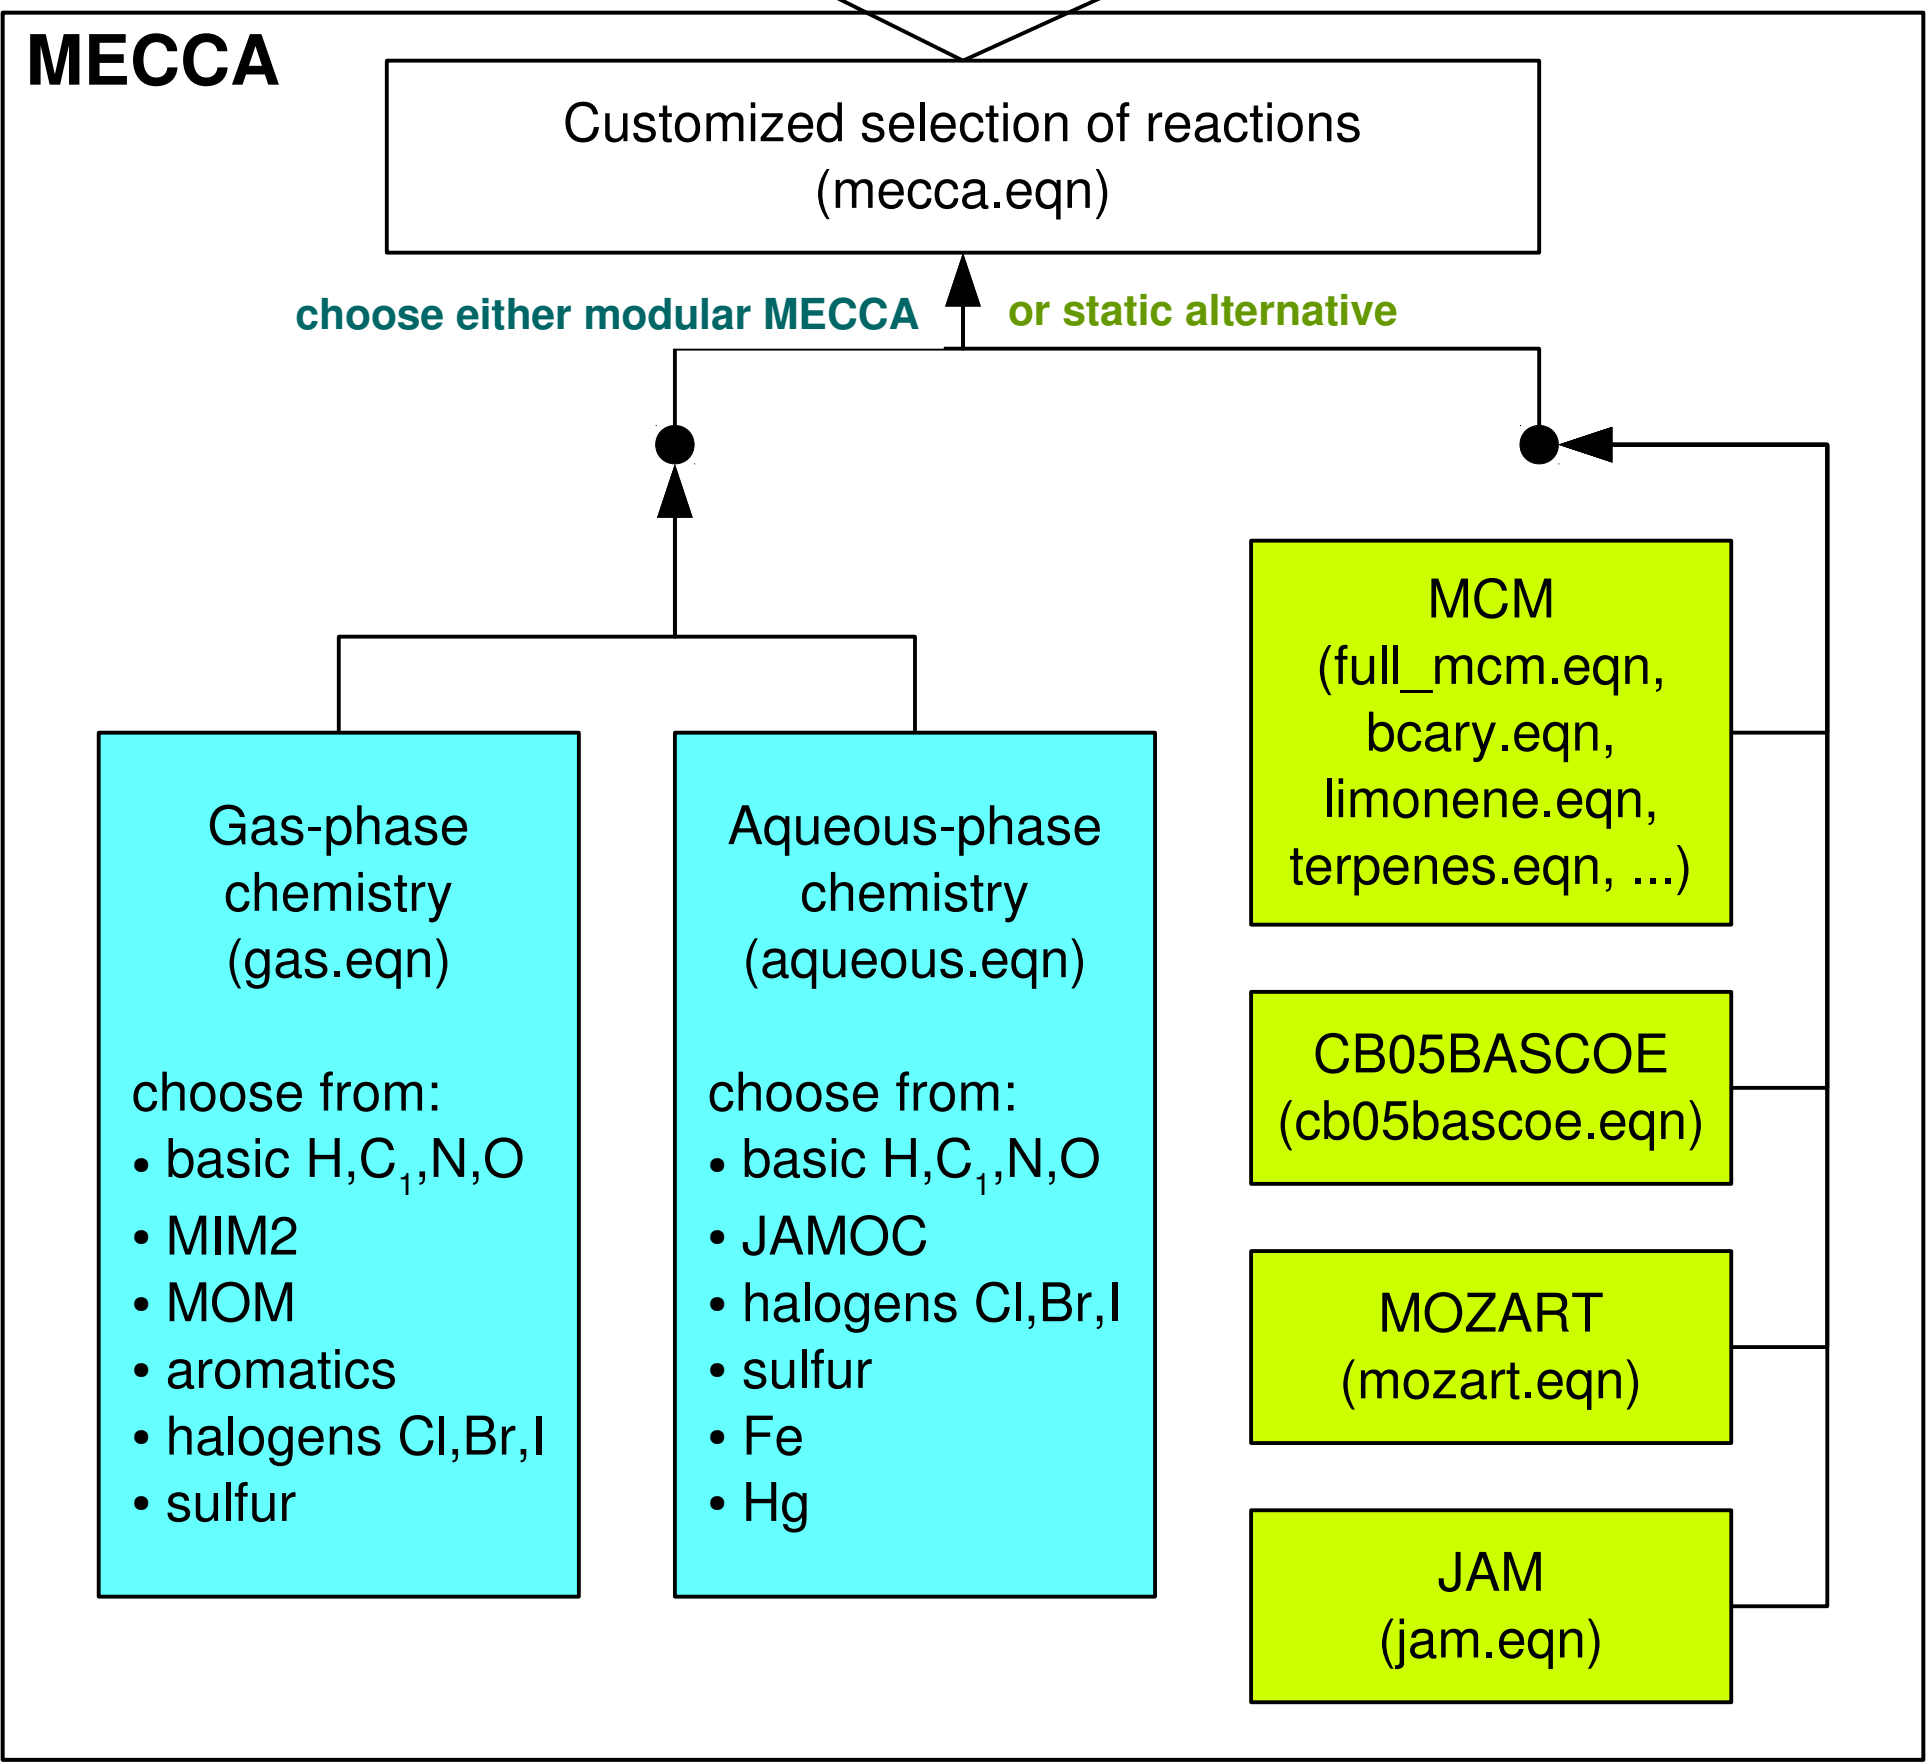

Supplement: Supplementary file 8 [file gmd-2024-166-supplement.zip]
